# Supplementary material
Source: PubMed Central journal article supplement (PMC4372728)

**Figure S1.** Task details. A) Flow of the experiment. B) Healthy eating manipulation. Mean view time was 1634 ms (min. 587 ms, max. 3409 ms, SD 587 ms).

**A**

| <b>Ratings Task</b>            | <b>Health Info</b>                   | <b>Choice Task</b>    |                         | <b>Outcome</b>      |
|--------------------------------|--------------------------------------|-----------------------|-------------------------|---------------------|
| Food ratings<br>(Mean 20 min.) | Health manipulation<br>(Mean 3 min.) | Mouse<br>(240 trials) | Keyboard<br>(40 trials) | One choice realized |

**B**

**Please read the following from an article on WebMD.com entitled “Healthy Eating”:**

**Why pay attention to what you eat?**  
Healthy eating will help you get the right balance of **vitamins**, **minerals**, and other **nutrients**. It will help you feel your best and have plenty of energy. It can help you **handle stress** better.

Healthy eating is one of the best things you can do to prevent and control many health problems, such as:

- ✦ **Heart disease.**
- ✦ **High blood pressure.**
- ✦ **Type 2 diabetes.**
- ✦ **Some types of cancer.**

**Press any key to continue.**

**Figure S2.** Mediation analyses. A) Analysis of the mediation effect final taste attribute weights have on the association between the earliest significance time of taste and self-control success ratios (SCSRs). B) Analogous analysis for the health.

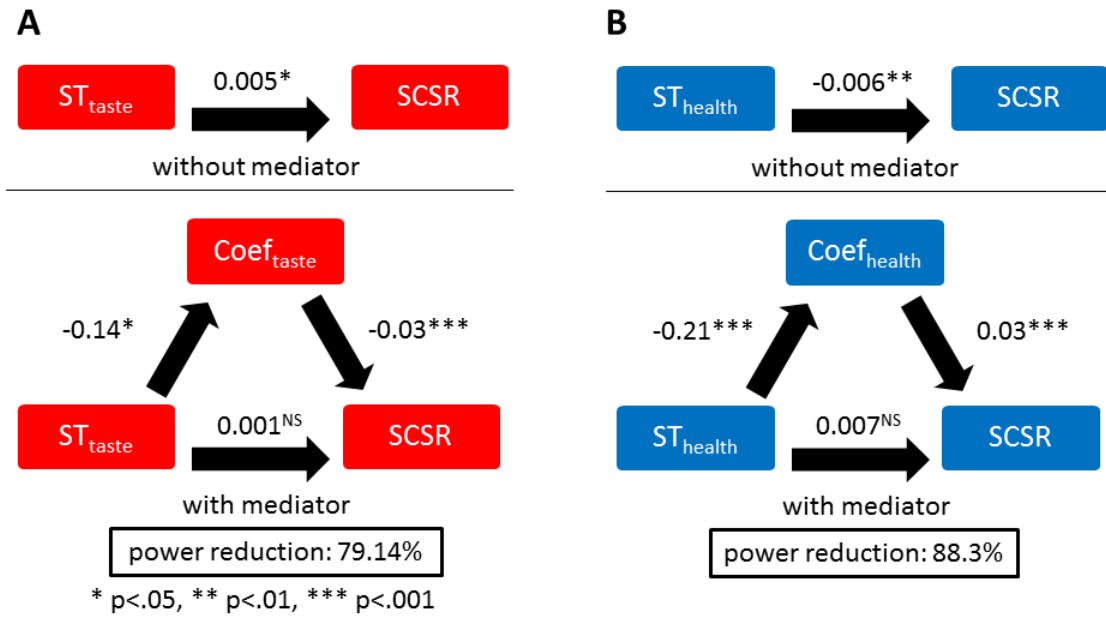

Supplement: NIHMS638046-supplement-sup_file.pdf [file NIHMS638046-supplement-sup_file.pdf]
